# Supplementary material for: Unravelling donor–acceptor film morphology formation for environmentally-friendly OPV ink formulations
Source: Royal Society of Chemistry journal article supplement (doi:10.1039/c9gc02288k), 2019-01-01
Supplement: c9gc02288k1.pdf [file c9gc02288k1.pdf]

## Supplementary Material

### Unravelling donor-acceptor film morphology formation for environmentally-friendly OPV ink formulations

Natalie P. Holmes<sup>a,b\*</sup>, Holly Munday<sup>b</sup>, Matthew G. Barr<sup>b</sup>, Lars Thomsen<sup>c</sup>, Matthew A. Marcus<sup>d</sup>, A. L. David Kilcoyne<sup>d</sup>, Adam Fahy<sup>b</sup>, Jan van Stam<sup>e</sup>, Paul C. Dastoor<sup>b</sup>, Ellen Moons<sup>a</sup>

<sup>a</sup> Department of Engineering and Physics, Karlstad University, Karlstad 65188, Sweden

<sup>b</sup> Centre for Organic Electronics, University of Newcastle, Callaghan NSW 2308, Australia

<sup>c</sup> Australian Synchrotron, ANSTO, Clayton, VIC 3168, Australia

<sup>d</sup> Advanced Light Source, Lawrence Berkeley National Laboratory, Berkeley, CA 94720, USA

<sup>e</sup> Department of Engineering and Chemical Sciences, Karlstad University, 65188 Karlstad, Sweden

\*Corresponding author: Natalie P. Holmes, [natalie.holmes@newcastle.edu.au](mailto:natalie.holmes@newcastle.edu.au)

## 1. List of solvents utilised for solubility tests

**Table S1.** Solvents utilised for solubility tests, with good solvents and non-solvents identified.

| Solvent                  | Solubility Identification |                     |
|--------------------------|---------------------------|---------------------|
|                          | TQ1                       | PC <sub>61</sub> BM |
| Acetone                  | Non-solvent               | Non-solvent         |
| 1-Butanol                | Non-solvent               | Non-solvent         |
| 2-Butanol                | Non-solvent               | Non-solvent         |
| Butyl acetate            | Non-solvent               | Good solvent        |
| Chlorobenzene            | Good solvent              | Good solvent        |
| Chloroform               | Good solvent              | Good solvent        |
| Cyclohexane              | Non-solvent               | Non-solvent         |
| Cyclohexanone            | Good solvent              | Good solvent        |
| Cyclopentyl methyl ether | Good solvent              | Good solvent        |
| Dichloromethane          | Good solvent              | Good solvent        |
| Dimethyl sulfoxide       | Non-solvent               | Non-solvent         |
| Dipropyl amine           | Good solvent              | Non-solvent         |
| Dipropylene glycol       | Non-solvent               | Non-solvent         |
| Ethanol                  | Non-solvent               | Non-solvent         |
| Ethyl acetate            | Non-solvent               | Non-solvent         |
| Ethyl benzene            | Good solvent              | Good solvent        |
| Formamide                | Non-solvent               | Non-solvent         |
| Glycerol                 | Non-solvent               | Non-solvent         |
| Isopropyl acetate        | Non-solvent               | Non-solvent         |
| Isopropyl benzene        | Good solvent              | Good solvent        |
| Mesitylene               | Good solvent              | Good solvent        |
| Methylacetate            | Non-solvent               | Non-solvent         |
| Methyl cyclohexane       | Non-solvent               | Non-solvent         |
| 2-Methyl tetrahydrofuran | Good solvent              | Good solvent        |
| N-Methyl formamide       | Non-solvent               | Non-solvent         |
| N,N-Dimethylformamide    | Non-solvent               | Non-solvent         |
| 1-Octanol                | Non-solvent               | Non-solvent         |
| o-Dichlorobenzene        | Good solvent              | Good solvent        |
| Pentyl acetate           | Non-solvent               | Good solvent        |
| 2-Propanol               | Non-solvent               | Non-solvent         |
| Propylene carbonate      | Non-solvent               | Non-solvent         |
| Tetrahydronaphthalene    | Good solvent              | Good solvent        |
| Tetrahydrofuran          | Good solvent              | Good solvent        |
| Toluene                  | Good solvent              | Good solvent        |
| o-Xylene                 | Good solvent              | Good solvent        |
| Water                    | Non-solvent               | Non-solvent         |

A disadvantage of the HSP method is that a large amount of material is required for the numerous solubility tests to generate data for the HSP calculation. Rather than choosing a concentration of 15 - 30 mg ml<sup>-1</sup> for the initial solubility tests we chose a concentration of 1 mg ml<sup>-1</sup> to minimise material use.

## 2. BHJ film preparation

**Table S2.** Spin coating and drying conditions for BHJ films. Thermal drying was utilised to remove residual solvent and additive.

| <b>Ink Code</b> | <b>TQ1:PC<sub>61</sub>BM<br/>w/w Ratio</b> | <b>Spin Coating<br/>Speed (RPM)</b> | <b>Spin<br/>Coating<br/>Time (min)</b> | <b>Drying<br/>Temperature<br/>(°C)</b> | <b>Drying<br/>Time<br/>(min)</b> |
|-----------------|--------------------------------------------|-------------------------------------|----------------------------------------|----------------------------------------|----------------------------------|
| Lim             | 1:2                                        | 2000                                | 1                                      | 80                                     | 10                               |
| Lim:2-MA        | 1:2                                        | 2000                                | 1                                      | 80                                     | 10                               |
| Lim:MO          | 1:2                                        | 2000                                | 1                                      | 80                                     | 10                               |
| Lim:MY          | 1:2                                        | 2000                                | 1                                      | 80                                     | 10                               |
| Ani:DE          | 1:2                                        | 2000                                | 1                                      | 140                                    | 5                                |
| Ani:DIO         | 1:2                                        | 1300                                | 1                                      | 100                                    | 5                                |
| 2-MA:Lim        | 1:2                                        | 2000                                | 1                                      | 140                                    | 5                                |
| o-DCB<br>(Ref)  | 1:1                                        | 2000                                | 1                                      | 80                                     | 10                               |

## 3. Safety phrases and classification of solvents and additives

**Table S3.** Toxicity, biodegradability and hazard statements for solvents and additives.

| <b>Solvent/Additive</b>  | <b>Oral Toxicity<br/>(LD<sub>50</sub>) mg/kg</b> | <b>Hazard Code</b>                                | <b>Biodegradability</b>                                                                   |
|--------------------------|--------------------------------------------------|---------------------------------------------------|-------------------------------------------------------------------------------------------|
| d-Limonene               | >5000;<br>4400                                   | H226, H304,<br>H315, H317,<br>H410                | 71 % - Readily biodegradable<br>(OECD Test Guideline 301B -<br>CO <sub>2</sub> evolution) |
| 2-Methylanisole          | >2000                                            | H226, H315                                        | Low persistence in air and soil.<br>Low bioaccumulative<br>potential.                     |
| Anisole                  | 3700                                             | H226                                              | Biodegradable                                                                             |
| Diphenyl ether           | 3370                                             | H410                                              | 62% Ratio BOD/ThBOD*                                                                      |
| 1-<br>Methylnaphthalene  | 1840                                             | H302, H315,<br>H317, H319,<br>H410                | Not readily biodegradable                                                                 |
| 1-<br>Methoxynaphthalene | Information<br>not available                     | H317, H410                                        | High persistence in water/soil<br>and air. Low bioaccumulative<br>potential.              |
| o-Dichlorobenzene        | 500                                              | H302, H332,<br>H315, H317,<br>H319, H335,<br>H410 | Not readily biodegradable                                                                 |
| 1,8-Diiodooctane         | Information<br>not available                     | H302, H315,<br>H319, H335                         | High persistence in water/soil<br>and air. High bioaccumulative<br>potential.             |

\*ThOD = Theoretical oxygen demand

BOD = Biochemical oxygen demand

H226: Flammable liquid and vapor [Warning: flammable liquids].

H302: Harmful if swallowed.

H304: May be fatal if swallowed and enters airways [Danger: aspiration hazard].

H315: Causes skin irritation [Warning: skin corrosion/irritation].

H317: May cause an allergic skin reaction [Warning: sensitisation, skin].

H319: Causes serious eye irritation [Warning: serious eye damage/eye irritation].

H332: Harmful if inhaled [Warning: acute toxicity, inhalation].

H335: May cause respiratory irritation [Warning: specific target organ toxicity, single exposure; respiratory tract irritation].

H336: May cause drowsiness or dizziness [Warning: specific target organ toxicity, single exposure; narcotic effects].

H373: Causes damage to organs through prolonged or repeated exposure [Warning: specific target organ toxicity, repeated exposure].

H400: Very toxic to aquatic life [Warning: hazardous to the aquatic environment, acute hazard].

H410: Very toxic to aquatic life with long lasting effects [Warning: hazardous to the aquatic environment, long-term hazard].
